# Supplementary material for: The HIV-1 Antisense Protein (ASP) induces CD8 T cell responses during chronic infection
Source: PubMed Central journal article supplement (PMC4335690; doi:10.1186/s12977-015-0135-y), 2015-02-10
Supplement: 12977_2015_135_MOESM1_ESM.pdf [file 12977_2015_135_MOESM1_ESM.pdf]

**Sup. table S1.** Demographic, HLA-typing, virological and clinical characteristics of patients

| ID | Gender | Age | Country | HLA-I <sup>a</sup> |      | CD4                | HIV infection         |                 | Treatment <sup>e</sup> |                 |
|----|--------|-----|---------|--------------------|------|--------------------|-----------------------|-----------------|------------------------|-----------------|
|    |        |     |         | A*02               | B*07 | count <sup>b</sup> | Duration <sup>c</sup> | VL <sup>d</sup> | Duration               | ART             |
|    |        |     |         |                    |      | <i>Cells/μl</i>    | <i>yr</i>             | <i>Cp / mL</i>  | <i>yr</i>              |                 |
| 1  | M      | 37  | US      | +                  | -    | 895                | <1                    | 151             | 0                      | none            |
| 2  | M      | 35  | US      | +                  | -    | 824                | <1                    | 125             | 0                      | none            |
| 3  | M      | 30  | US      | -                  | -    | 468                | 9                     | 6900            | 0                      | none            |
| 4  | F      | 38  | US      | -                  | +    | 908                | 1                     | 616             | 0                      | none            |
| 5  | F      | 48  | US      | -                  | -    | 827                | <1                    | 47              | 0                      | none            |
| 6  | F      | 40  | US      | -                  | -    | 805                | <1                    | 47              | 0                      | none            |
| 7  | M      | 60  | US      | -                  | -    | 1176               | 1                     | 14900           | 0                      | none            |
| 8  | M      | 57  | US      | -                  | -    | 1145               | <1                    | 329             | 0                      | none            |
| 9  | M      | 42  | US      | +                  | -    | 837                | 1                     | 21              | 0                      | none            |
| 10 | F      | 54  | US      | +                  | -    | 449                | <1                    | 16400           | 0                      | none            |
| 11 | F      | 46  | US      | +                  | +    | 996                | 1                     | 189             | 0                      | none            |
| 12 | M      | 42  | US      | -                  | -    | 747                | <1                    | 1890            | 0                      | none            |
| 13 | M      | 74  | US      | -                  | -    | 547                | <1                    | 2260            | 0                      | none            |
| 14 | M      | 42  | US      | -                  | -    | 651                | 1                     | 1127            | 0                      | none            |
| 15 | M      | 70  | US      | +                  | -    | 731                | 1                     | 8990            | 0                      | none            |
| 16 | M      | 54  | US      | +                  | +    | 583                | 5                     | 6940            | 0                      | none            |
| 17 | M      | 39  | US      | +                  | -    | 653                | 2                     | 90              | 0                      | none            |
| 18 | M      | 50  | US      | +                  | -    | 617                | 3                     | 184             | 0                      | none            |
| 19 | M      | 63  | US      | -                  | -    | 647                | 3                     | 248             | 0                      | none            |
| 20 | F      | 54  | US      | -                  | -    | 922                | <1                    | 70              | 0                      | none            |
| 21 | F      | 60  | US      | -                  | -    | 1036               | <1                    | 105             | 0                      | none            |
| 22 | F      | 48  | US      | -                  | -    | 550                | 2                     | 8400            | 0                      | none            |
| 23 | F      | 47  | US      | -                  | -    | 818                | 2                     | 6560            | 0                      | none            |
| 24 | M      | 46  | US      | nd                 | nd   | 789                | <1                    | 7800            | 0                      | none            |
| 25 | F      | 50  | US      | nd                 | nd   | 600                | <1                    | 1970            | 0                      | none            |
| 26 | M      | 37  | FR      | +                  | nd   | 762                | 1                     | 489             | 0                      | none            |
| 27 | M      | 35  | FR      | +                  | nd   | 805                | 5                     | nd              | 0                      | none            |
| 28 | M      | 30  | FR      | +                  | nd   | 478                | 7                     | <20             | 0                      | none            |
| 29 | M      | 38  | FR      | +                  | nd   | 421                | 8                     | <20             | 6                      | AZT-3TC         |
| 30 | F      | 48  | FR      | +                  | nd   | 432                | 21                    | <20             | 19                     | ETV-RAL-RTV-DRV |
| 31 | M      | 40  | FR      | +                  | nd   | 679                | 21                    | <20             | 19                     | RTV-ATV-FTC-TDF |
| 32 | M      | 60  | FR      | +                  | nd   | 431                | 29                    | <20             | 15                     | FTC-EFV-TDF     |
| 33 | F      | 57  | FR      | +                  | nd   | 402                | 2                     | <20             | 2                      | ABC-3TC         |
| 34 | M      | 42  | FR      | +                  | nd   | 467                | 6                     | <20             | <1                     | FTC-TDF         |
| 35 | M      | 54  | FR      | +                  | nd   | 610                | 27                    | <20             | 25                     | MVC-RAL-ABC-3TC |
| 36 | M      | 46  | FR      | +                  | nd   | 532                | 15                    | <20             | 15                     | RTV-ATV-FTC-TDF |
| 37 | M      | 42  | FR      | +                  | nd   | 564                | 9                     | <20             | 9                      | AZT-3TC-EFV     |
| 38 | M      | 74  | FR      | +                  | nd   | 202                | 11                    | 166             | 10                     | LPV/r-FTC-TDF   |
| 39 | F      | 42  | FR      | +                  | nd   | 302                | 8                     | <20             | 8                      | RTV-ATV-FTC-TDF |
| 40 | M      | 70  | FR      | +                  | nd   | 377                | 7                     | <20             | 1                      | FTC-EFV-TDF     |
| 41 | F      | 54  | FR      | +                  | nd   | 418                | 4                     | <20             | 3                      | FTC-EFV-TDF     |
| 42 | F      | 39  | FR      | +                  | nd   | 18                 | <1                    | 10165           | <1                     | RTV-DRV-FTC-TDF |
| 43 | M      | 50  | FR      | +                  | nd   | 332                | 26                    | 23              | 18                     | EFV-FTC-TDF     |
| 44 | M      | 63  | FR      | +                  | nd   | 578                | 6                     | 29              | 6                      | RAL-FTC-TDF     |
| 45 | F      | 54  | FR      | +                  | nd   | 283                | 20                    | <20             | 14                     | RTV-DRV-FTC-TDF |
| 46 | M      | 60  | FR      | +                  | nd   | 606                | 14                    | <20             | 16                     | ABC-3TC-RTV-DRV |

**Sup. table S1.** Demographic, HLA-typing, virological and clinical characteristics of patients

| ID | Gender | Age | Country | HLA-I <sup>a</sup> |      | CD4                            | HIV infection         |                 | Treatment <sup>e</sup> |                         |
|----|--------|-----|---------|--------------------|------|--------------------------------|-----------------------|-----------------|------------------------|-------------------------|
|    |        |     |         | A*02               | B*07 | count <sup>b</sup>             | Duration <sup>c</sup> | VL <sup>d</sup> | Duration               | ART                     |
|    |        |     |         |                    |      | <i>Cells/<math>\mu</math>l</i> | <i>yr</i>             | <i>Cp / mL</i>  | <i>yr</i>              |                         |
| 47 | M      | 48  | FR      | +                  | nd   | 595                            | 22                    | <20             | 20                     | RAL-RTV-DRV-ABC-3TC-TDF |
| 48 | M      | 47  | FR      | +                  | nd   | 270                            | 26                    | 26265           | 3                      | RTV-DRV-FTC-TDF         |
| 49 | M      | 46  | FR      | +                  | nd   | 1854                           | 23                    | <20             | 16                     | RTV-ATV-FTC-TDF         |
| 50 | M      | 32  | FR      | +                  | nd   | 213                            | 1                     | 391             | 1                      | MVC-RTV-DRV-FTC-TDF     |
| 51 | F      | 37  | FR      | +                  | nd   | 318                            | 9                     | <20             | 2                      | LPV/r                   |
| 52 | F      | 40  | FR      | +                  | nd   | 613                            | 9                     | 27              | 3                      | ABC-3TC-RTV-ATV         |
| 53 | F      | 38  | FR      | +                  | nd   | 380                            | 2                     | 49              | <1                     | RTV-DRV-FTC-TDF         |
| 54 | M      | 55  | FR      | +                  | nd   | 900                            | 27                    | <20             | 16                     | RAL-NVP                 |
| 55 | M      | 76  | FR      | +                  | nd   | 523                            | 23                    | <20             | 21                     | ETV-RAL-ABC-3TC         |
| 56 | M      | 43  | FR      | +                  | nd   | 459                            | 21                    | <20             | 16                     | RTV-DRV                 |
| 57 | M      | 47  | FR      | +                  | nd   | 509                            | 13                    | <20             | 11                     | AZT-3TC-ABC             |
| 58 | M      | 55  | FR      | +                  | nd   | 823                            | 19                    | <20             | 19                     | ABC-3TC-RTV-ATV         |
| 59 | M      | 57  | FR      | +                  | nd   | 1111                           | 18                    | <20             | 17                     | RTV-DRV-ABC-3TC-ETV     |
| 60 | M      | 52  | FR      | +                  | nd   | 669                            | 24                    | 60              | 14                     | RTV-DRV                 |
| 61 | F      | 57  | FR      | +                  | nd   | 1112                           | 15                    | <20             | 8                      | RTV-ATV-FTC-TDF         |
| 62 | F      | 49  | FR      | +                  | nd   | 441                            | 14                    | <20             | 11                     | RTV-ATV                 |
| 63 | M      | 86  | FR      | +                  | nd   | 601                            | 9                     | <20             | 8                      | RAL-ABC-3TC             |
| 64 | M      | 48  | FR      | +                  | nd   | 429                            | 26                    | <20             | 21                     | SQV-RTV-ATV             |
| 65 | M      | 40  | FR      | +                  | nd   | 267                            | 10                    | <20             | 7                      | RTV-DRV-ABC-3TC-MVC     |
| 66 | F      | 29  | FR      | +                  | -    | 800                            | 2                     | 21              | 2                      | ABC-3TC-RTV-ATV         |
| 67 | M      | 50  | FR      | +                  | -    | 341                            | 23                    | <20             | 6                      | 3TC-EFV-TDF             |
| 68 | M      | 56  | FR      | +                  | -    | 508                            | 24                    | 975             | 0                      | none                    |
| 69 | M      | 48  | FR      | +                  | +    | 553                            | 12                    | 89              | <1                     | ETV-FTC-TDF             |
| 70 | M      | 23  | FR      | +                  | +    | 432                            | 1                     | <20             | 1                      | RAL-FTC-TDF             |
| 71 | M      | 59  | FR      | +                  | +    | 518                            | 25                    | <20             | 5                      | RAL-FTC-TDF             |
| 72 | F      | 48  | FR      | +                  | +    | 238                            | 28                    | <20             | 22                     | MVC-RTV-DRV             |
| 73 | M      | 45  | FR      | +                  | +    | 709                            | 2                     | <20             | 1                      | RTV-DRV                 |
| 74 | F      | 34  | FR      | +                  | +    | 460                            | 12                    | 22              | 12                     | ABC-3TC-RTV-DRV         |
| 75 | M      | 56  | FR      | nd                 | +    | 429                            | 22                    | 56              | 0                      | none                    |
| 76 | F      | 51  | FR      | nd                 | +    | 218                            | 2                     | <20             | 2                      | RTV-DRV-FTC-TDF         |
| 77 | M      | 42  | FR      | nd                 | +    | 236                            | 8                     | <20             | 8                      | RAL-FTC-TDF             |
| 78 | M      | 25  | FR      | nd                 | +    | 650                            | 6                     | <20             | 2                      | FTC-EFV-TDF             |
| 79 | M      | 43  | FR      | nd                 | +    | 597                            | 25                    | <20             | 17                     | RAL-RTV-DRV-ATV-FTC-TDF |
| 80 | M      | 55  | FR      | nd                 | +    | 746                            | 28                    | <20             | 0                      | none                    |
| 81 | M      | 43  | FR      | nd                 | +    | 653                            | 14                    | <20             | 14                     | RTV-DRV-FTC-TDF         |
| 82 | M      | 28  | FR      | nd                 | +    | 203                            | 5                     | <20             | 2                      | RTV-DRV-FTC-TDF         |
| 83 | M      | 57  | FR      | nd                 | +    | 854                            | 15                    | 101             | 15                     | MVC-FTC-TDF             |
| 84 | M      | 50  | FR      | nd                 | +    | 423                            | 26                    | <20             | 4                      | ETV-RAL-RTV-DRV-FTC-TDF |
| 85 | M      | 53  | FR      | nd                 | +    | 476                            | 26                    | 45              | 23                     | MVC-ETV-RAL             |
| 86 | M      | 70  | FR      | nd                 | +    | 356                            | 21                    | <20             | 15                     | ABC-3TC-EFV             |
| 87 | M      | 22  | FR      | nd                 | +    | 25                             | <1                    | 122633          | 0                      | none                    |
| 88 | M      | 51  | FR      | nd                 | +    | 746                            | 27                    | <20             | 22                     | ATV-FTC-TDF             |
| 89 | M      | 61  | FR      | -                  | nd   | 998                            | 27                    | 75              | 17                     | LPV/r-ABC-3TC           |
| 90 | M      | 37  | FR      | -                  | nd   | 394                            | 9                     | <20             | 4                      | FTC-EFV-TDF             |
| 91 | F      | 41  | FR      | -                  | nd   | 619                            | 15                    | 35              | 15                     | RTV-DRV-FTC-TDF         |
| 92 | M      | 63  | FR      | -                  | nd   | 345                            | 26                    | 57              | 19                     | RTV-DRV-FTC-TDF         |

**Sup. table S1.** Demographic, HLA-typing, virological and clinical characteristics of patients

| ID  | Gender | Age | Country | HLA-I <sup>a</sup> |      | CD4                            | HIV infection         |                 | Treatment <sup>e</sup> |                     |
|-----|--------|-----|---------|--------------------|------|--------------------------------|-----------------------|-----------------|------------------------|---------------------|
|     |        |     |         | A*02               | B*07 | count <sup>b</sup>             | Duration <sup>c</sup> | VL <sup>d</sup> | Duration               | ART                 |
|     |        |     |         |                    |      | <i>Cells/<math>\mu</math>l</i> | <i>yr</i>             | <i>Cp / mL</i>  | <i>yr</i>              |                     |
| 93  | F      | 39  | FR      | -                  | nd   | 440                            | 14                    | <20             | 5                      | 3TC-LPV/r           |
| 94  | M      | 58  | FR      | -                  | nd   | 347                            | 7                     | <20             | 7                      | AZT-3TC-LPV/r       |
| 95  | M      | 32  | FR      | -                  | nd   | 462                            | 3                     | 84735           | 3                      | FTC-EFV-TDF         |
| 96  | F      | 52  | FR      | nd                 | -    | 364                            | 3                     | <20             | 3                      | ETV-FTC-TDF         |
| 97  | M      | 50  | FR      | nd                 | -    | 360                            | 20                    | <20             | 13                     | RAL-FTC-TDF         |
| 98  | F      | 32  | FR      | +                  | -    | 820                            | 4                     | <20             | 4                      | ABC-3TC-RTV-ATV     |
| 99  | M      | 48  | FR      | +                  | -    | 400                            | 9                     | <20             | 4                      | ETV-FTC-TDF         |
| 100 | F      | 79  | FR      | +                  | -    | 187                            | <1                    | <20             | <1                     | RAL-FTC-TDF         |
| 101 | M      | 56  | FR      | +                  | -    | 571                            | 29                    | <20             | 26                     | ETV-RTV-DRV         |
| 102 | F      | 61  | FR      | +                  | -    | 611                            | 22                    | <20             | 17                     | ABC-3TC-ATV         |
| 103 | M      | 40  | FR      | +                  | -    | 363                            | 2                     | <20             | 2                      | FTC-TMC 278-TDF     |
| 104 | M      | 47  | FR      | -                  | +    | 654                            | 20                    | <20             | 19                     | FTC-TDF             |
| 105 | M      | 55  | FR      | -                  | +    | 646                            | 19                    | <20             | 19                     | RAL-ABC-3TC-RTV-DRV |
| 106 | M      | 28  | FR      | -                  | +    | 901                            | 2                     | <20             | 2                      | ABC-3TC-RTV-DRV     |
| 107 | F      | 33  | FR      | -                  | +    | 129                            | <1                    | 34521           | <1                     | FTC-EFV-TDF         |
| 108 | M      | 28  | FR      | -                  | +    | 1059                           | 6                     | <20             | 5                      | ABC-3TC-ATV         |
| 109 | M      | 48  | FR      | -                  | +    | 403                            | 5                     | <20             | 5                      | RTV-ATV-FTC-TDF     |
| 110 | M      | 33  | FR      | -                  | +    | 611                            | 6                     | <20             | 5                      | RTV-ATV-FTC-TDF     |
| 111 | M      | 40  | FR      | -                  | -    | 859                            | 6                     | <20             | 3                      | DTG                 |
| 112 | M      | 62  | FR      | -                  | -    | 838                            | 20                    | <20             | 20                     | ATV-FTC-TDF         |
| 113 | F      | 43  | FR      | -                  | -    | 806                            | 17                    | <20             | 16                     | MVC-ATV             |
| 114 | M      | 42  | FR      | -                  | -    | 535                            | 7                     | <20             | 7                      | EFV-FTC-TDF         |
| 115 | M      | 39  | FR      | -                  | -    | 1231                           | 10                    | <20             | 9                      | FTC-RTV-ATV         |
| 116 | F      | 34  | FR      | -                  | -    | 1045                           | 5                     | <20             | 1                      | FTC-TDF             |
| 117 | F      | 29  | FR      | -                  | -    | 552                            | 11                    | <20             | 11                     | ATV-FTC-TDF         |
| 118 | F      | 59  | FR      | -                  | -    | 564                            | 26                    | <20             | 16                     | RAL-ATV             |
| 119 | M      | 65  | FR      | -                  | -    | 575                            | 20                    | <20             | 18                     | FTC-EFV-TDF         |
| 120 | M      | 49  | FR      | -                  | -    | 517                            | 19                    | <20             | 19                     | ATV-FTC-TDF         |
| 121 | M      | 43  | FR      | -                  | -    | 522                            | 2                     | <20             | 2                      | FTC-TMC 278-TDF     |
| 122 | F      | 65  | FR      | -                  | -    | 263                            | 21                    | <20             | 19                     | ETV-RAL             |
| 123 | F      | 51  | FR      | -                  | -    | 1104                           | 28                    | <20             | 21                     | ABC-3TC-RTV-DRV     |
| 124 | F      | 48  | FR      | -                  | -    | 644                            | 25                    | <20             | 19                     | RAL-FTC-TDF         |
| 125 | M      | 76  | FR      | -                  | -    | 537                            | 30                    | <20             | 23                     | MVC-ETV             |
| 126 | M      | 44  | FR      | -                  | -    | 579                            | <1                    | 2951507         | 0                      | none                |

Individuals showing ASP-specific T cell responses (ASP responders) are highlighted in grey

<sup>a</sup> HLA-A\*02 and -B\*07 positive (+) or negative (-) status determined by genotyping for Pats.1 to 25. For Pats.26 to 126, HLA typing was determined by flow cytometry, and HLA type of ASP responders was confirmed by genotyping.

<sup>b</sup> Peripheral CD4+ T lymphocyte count at the time of study.

<sup>c</sup> Time since HIV-1 detection

<sup>d</sup> Copies of HIV-1 RNA per milliliter of plasma at the time of study.

<sup>e</sup> Treatment at the time of the study.

FTC, Emtricitabine; EFV, Efavirenz; ABC, Abacavir; NVP, Nevirapine; 3TC, Lamivudine; AZT, Zidovudine; RTV, Ritonavir; SQV, Saquinavir; TDF, Tenofovir disoproxil fumarate; ETV, Etravirine; ATV, Atazanavir; RAL, Raltegravir; MVC, Maraviroc; DRV, Darunavir; LPV/r, lopinavir/ritonavir; DTG, Dolutegravir; EVG, Elvitegravir; TMC 278, Rilpivirine

ID, identifier; ART, antiretroviral therapy; nd, not determined
