# Supplementary material for: The HIV-1 Antisense Protein (ASP) induces CD8 T cell responses during chronic infection
Source: PubMed Central journal article supplement (PMC4335690; doi:10.1186/s12977-015-0135-y), 2015-02-10
Supplement: 12977_2015_135_MOESM2_ESM.pdf [file 12977_2015_135_MOESM2_ESM.pdf]

# Suppl. Fig. S1

A.

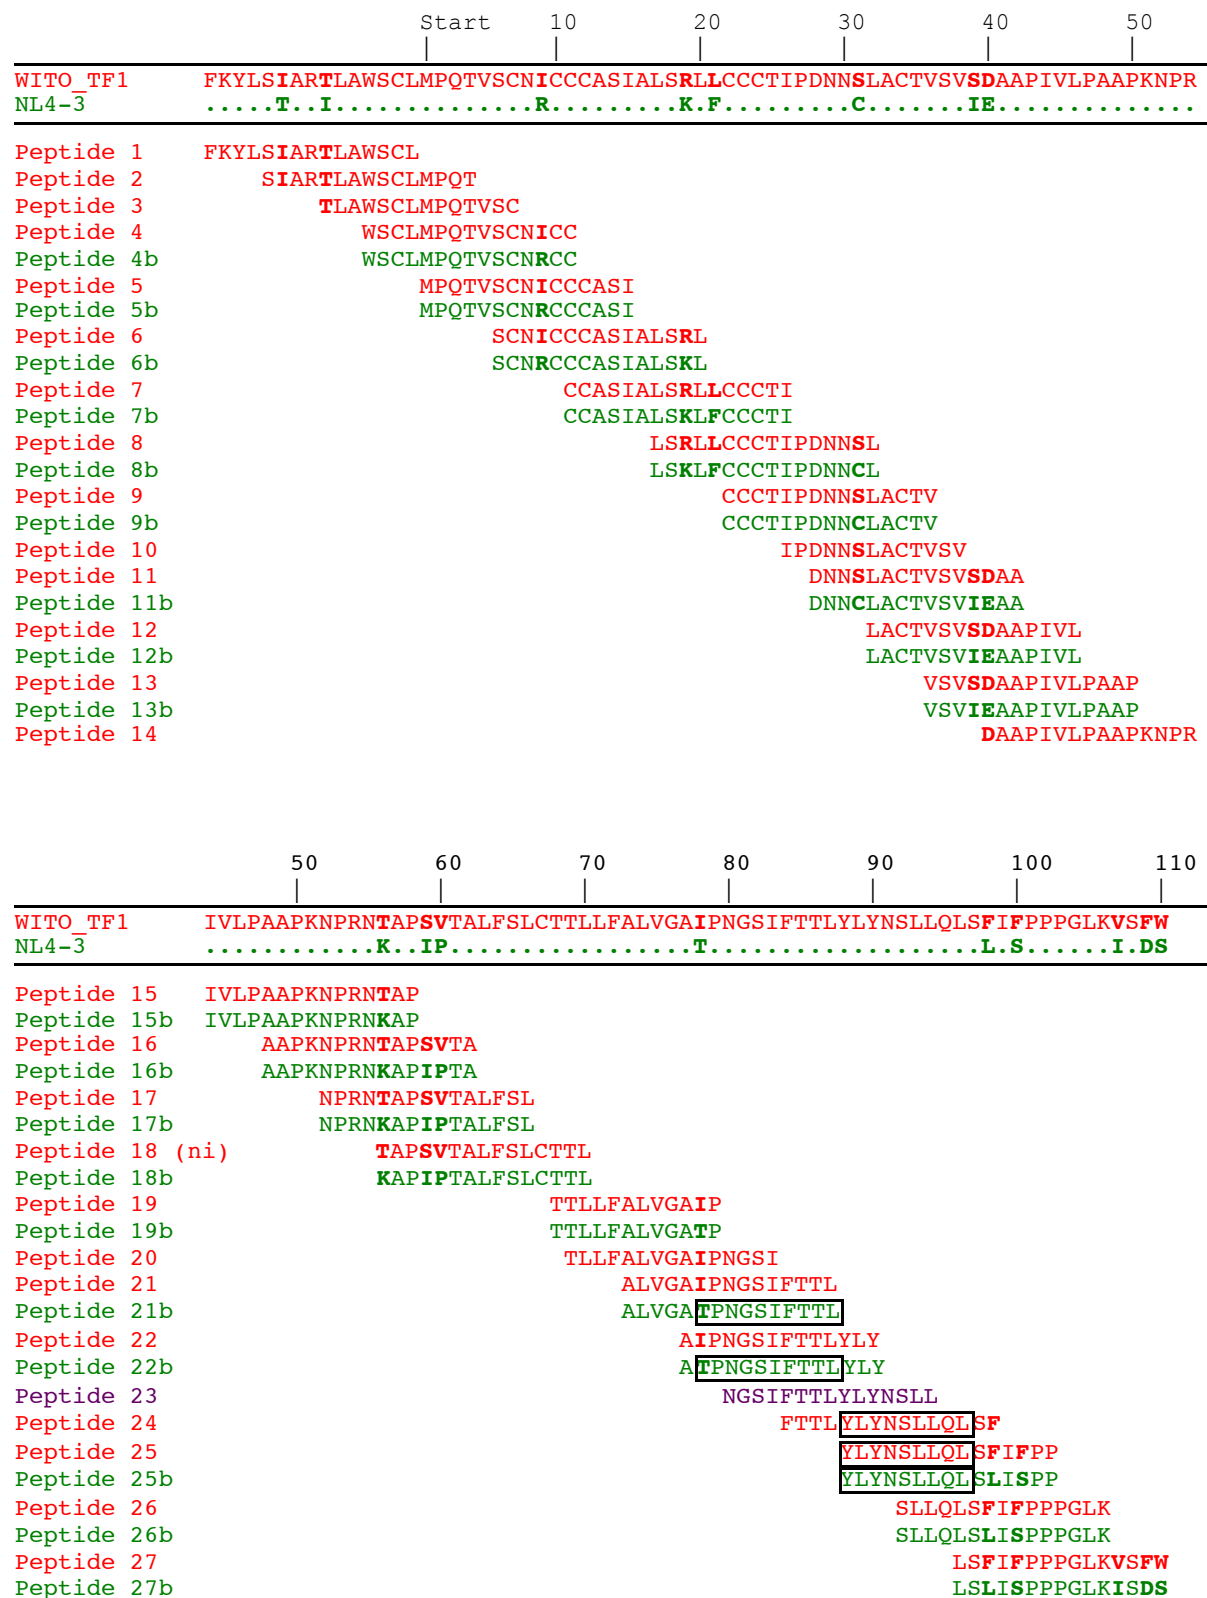

# Suppl. Fig. S1 (continued)

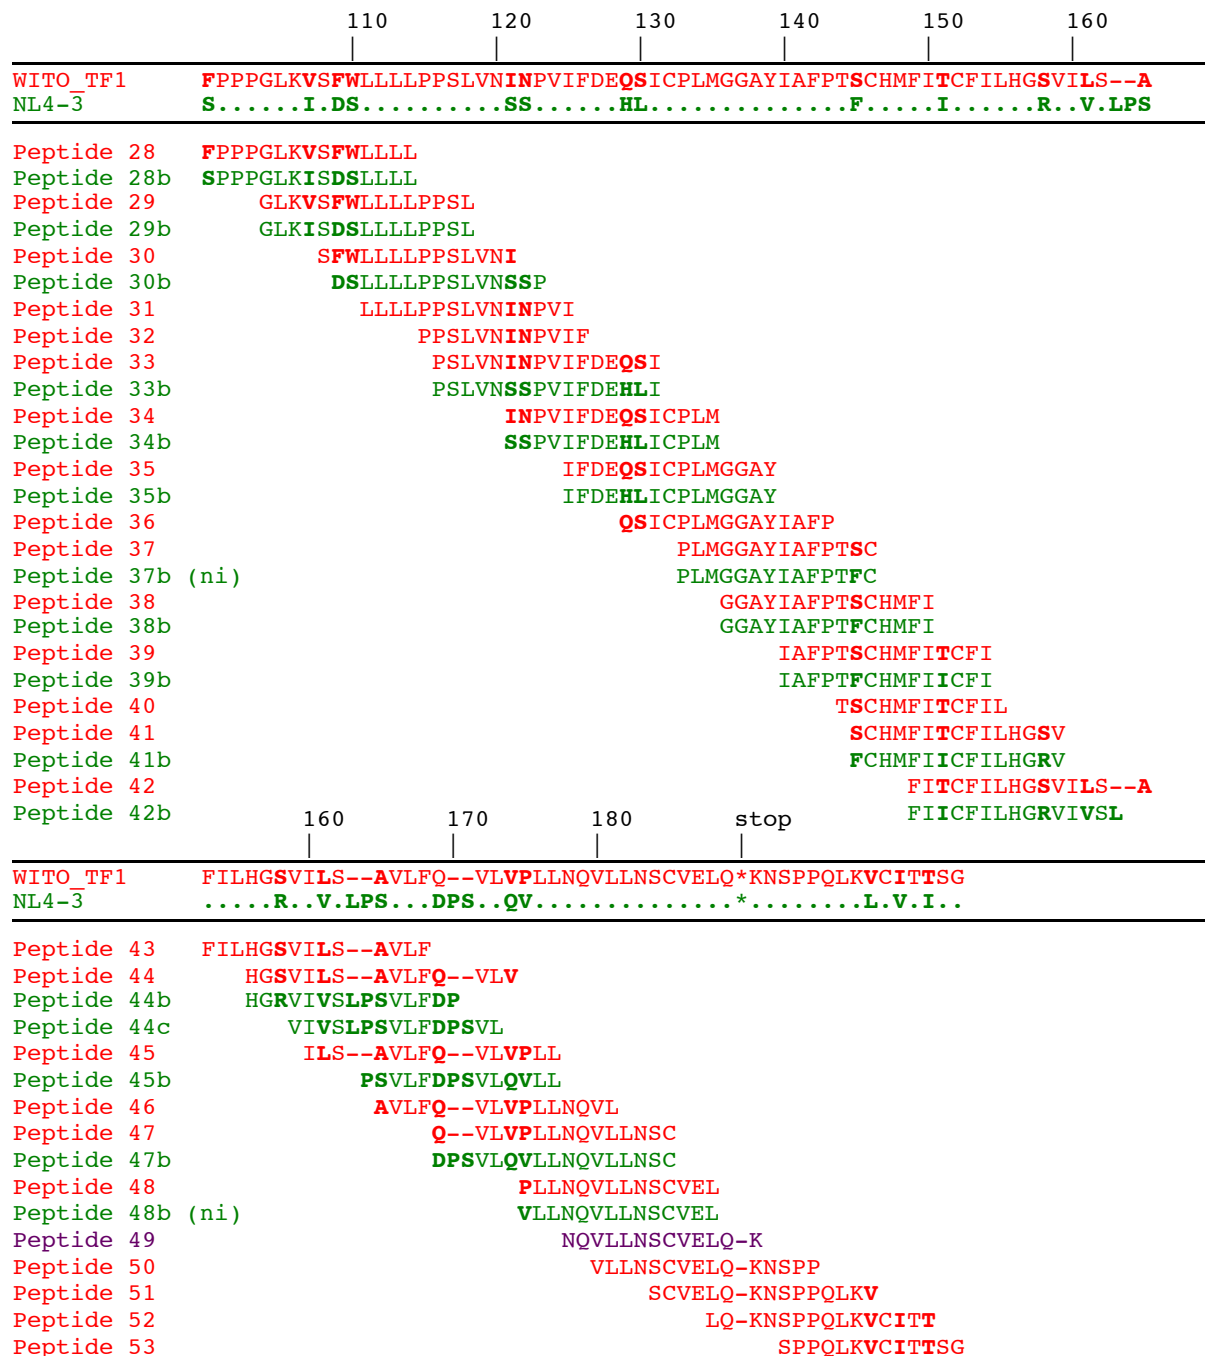

## B.

|        | Sub.1      | Sub.2      | Sub.3      | Sub.4      | Sub.5      | Sub.6       | Sub.7       | Sub.8       | Sub.9       |                |            |
|--------|------------|------------|------------|------------|------------|-------------|-------------|-------------|-------------|----------------|------------|
| Sub. A | Peptide 1  | Peptide 11 | Peptide 22 | Peptide 32 | Peptide 42 | Peptide 52  | Peptide 13b | Peptide 27b | Peptide 42b | -              | Responders |
| Sub. B | Peptide 2  | Peptide 12 | Peptide 23 | Peptide 33 | Peptide 43 | Peptide 53  | Peptide 15b | Peptide 28b | Peptide 44b | Pat.18, Pat.19 |            |
| Sub. C | Peptide 3  | Peptide 13 | Peptide 24 | Peptide 34 | Peptide 44 | Peptide 54  | Peptide 16b | Peptide 29b | Peptide 44c | -              |            |
| Sub. D | Peptide 4  | Peptide 14 | Peptide 25 | Peptide 35 | Peptide 45 | Peptide 5b  | Peptide 17b | Peptide 30b | Peptide 45b | Pat.07         |            |
| Sub. E | Peptide 5  | Peptide 15 | Peptide 26 | Peptide 36 | Peptide 46 | Peptide 6b  | Peptide 18b | Peptide 33b | Peptide 47b | Pat.19         |            |
| Sub. F | Peptide 6  | Peptide 16 | Peptide 27 | Peptide 37 | Peptide 47 | Peptide 7b  | Peptide 19b | Peptide 34b |             | -              |            |
| Sub. G | Peptide 7  | Peptide 17 | Peptide 28 | Peptide 38 | Peptide 48 | Peptide 8b  | Peptide 21b | Peptide 35b |             | -              |            |
| Sub. H | Peptide 8  | Peptide 19 | Peptide 29 | Peptide 39 | Peptide 49 | Peptide 9b  | Peptide 22b | Peptide 38b |             | Pat.07         |            |
| Sub. I | Peptide 9  | Peptide 20 | Peptide 30 | Peptide 40 | Peptide 50 | Peptide 11b | Peptide 25b | Peptide 39b |             | Pat.09, Pat.21 |            |
| Sub. J | Peptide 10 | Peptide 21 | Peptide 31 | Peptide 41 | Peptide 51 | Peptide 12b | Peptide 26b | Peptide 41b |             | -              |            |
|        |            |            |            |            |            |             | Pat.04      |             |             |                | Responders |
