# Supplementary material for: The HIV-1 Antisense Protein (ASP) induces CD8 T cell responses during chronic infection
Source: PubMed Central journal article supplement (PMC4335690; doi:10.1186/s12977-015-0135-y), 2015-02-10
Supplement: 12977_2015_135_MOESM3_ESM.pdf [file 12977_2015_135_MOESM3_ESM.pdf]

**Supplemental Table S2.Binding affinity and conservation of HLA-A\*02- and HLA-B\*07-restricted HIV-1 epitopes.**

| Restriction | Epitope                | HIV-1 antigen          | Peptide         | aa               | Location <sup>1</sup> |           | HLA-I binding score <sup>2</sup> |           |           | Epitope conservation (%) <sup>3</sup> |           |
|-------------|------------------------|------------------------|-----------------|------------------|-----------------------|-----------|----------------------------------|-----------|-----------|---------------------------------------|-----------|
|             |                        |                        |                 |                  | genome                | antigen   | BIMAS                            | SYFPEITHI | NetMHC    | Group M                               | Clade B   |
| HLA-A*0201  | Published <sup>4</sup> | Gag <sub>p17</sub>     | Gag-SL9         | SLYNTVATL        | 1018                  | 77        | 157                              | 31        | 94        | 32                                    | 46        |
|             | Published <sup>4</sup> | Pol                    | Pol-IV9         | ILKEPVHGV        | 3474                  | 464       | -                                | 30        | 72        | 61                                    | 76        |
|             | Published <sup>4</sup> | Env                    | Env-KL9         | KLTPLCVTL        | 6585                  | 121       | 75                               | 27        | 27        | 81                                    | 86        |
|             | Published <sup>4</sup> | Nef                    | Nef-LL9         | LTFGWCFKL        | 9364                  | 190       | -                                | 21        | 33        | 65                                    | 73        |
|             | Predicted              | ASP                    | ASP-AL9         | ALFSLCTTL        | 7759                  | 62        | -                                | -         | 20        | 42                                    | 87        |
|             | Predicted              | ASP                    | ASP-SL10        | SLCTTLLFAL       | 7750                  | 65        | 285                              | -         | 25        | 35                                    | 80        |
|             | Predicted              | ASP                    | <b>ASP-YL9</b>  | <b>YLYNSLLQL</b> | <b>7686</b>           | <b>88</b> | <b>723</b>                       | <b>28</b> | <b>7</b>  | <b>85</b>                             | <b>90</b> |
|             | Predicted              | ASP                    | ASP-SL9         | SLISPPPGL        | 7654                  | 97        | -                                | 27        | 44        | 38                                    | 52        |
|             | Predicted              | ASP                    | ASP-VV10        | VLFDPVSLQV       | 7447                  | 166       | 4125                             | -         | 12        | <1                                    | <1        |
|             | Predicted              | ASP                    | ASP-VL9         | VLLNSCVEL        | 7405                  | 180       | 134                              | 27        | 14        | 2.8                                   | 8         |
| HLA-B*0702  | Published <sup>4</sup> | Gag <sub>p24</sub>     | Gag-SV9         | SPRTLNAWV        | 1231                  | 148       | -                                | 19        | 19        | 92                                    | 94        |
|             | Published <sup>4</sup> | Gag <sub>p24</sub>     | Gag-TL9         | TPQDLNTML        | 1327                  | 180       | 80                               | 21        | -         | 68                                    | 94        |
|             | Published <sup>4</sup> | Gag <sub>p27p156</sub> | Gag-YF10        | YPLASLRSLF       | 2239                  | 484       | -                                | 21        | 13        | 12                                    | 40        |
|             | Published <sup>4</sup> | Vpu                    | Vpu-QL10        | QPIQIAIAL        | 6065                  | 2         | 80                               | 22        | 82        | <1                                    | 1         |
|             | Published <sup>4</sup> | Env                    | Env-AV10        | APTKAKRRRVV      | 7713                  | 497       | -                                | 21        | 24        | 32                                    | 72        |
|             | Published <sup>4</sup> | Nef                    | Nef-RL9         | RPMTYKAAL        | 9025                  | 77        | 240                              | 24        | 7         | 5                                     | 8         |
|             | Predicted              | ASP                    | <b>ASP-TL10</b> | <b>TPNGSIFTL</b> | <b>7711</b>           | <b>78</b> | <b>80</b>                        | <b>24</b> | <b>76</b> | <b>15</b>                             | <b>35</b> |
|             | Predicted              | ASP                    | ASP-DL9         | DPSVLQVLL        | 7438                  | 169       | 80                               | 24        | -         | <1                                    | <1        |

<sup>1</sup> HXB2 nucleotide location and ASP or Gag aa position

<sup>2</sup> Relative scores from 3 algorithms predicting association of the peptide candidate with HLA-A\*02 or HLA-B\*07. Scores >80 for BIMAS, >24 for SYFPEITHI and <80 for NetMHC are predictive of a high HLA-I binding

<sup>3</sup> Determined using sequences from Los Alamos database; 4,418 (group M); 1,934 (clade B)

<sup>4</sup> References 40-42

- : not predicted; aa: amino acid
